# Supplementary material for: Virulent Clones of Klebsiella pneumoniae: Identification and Evolutionary Scenario Based on Genomic and Phenotypic Characterization
Source: PubMed Central journal article supplement (PMC2656620; doi:10.1371/journal.pone.0004982), 2009-03-25
Supplement: pone.0004982.s003.pdf [file pone.0004982.s003.pdf]

**Table S3. Carbon sources assayed using the Biotype-100 strips.**

| Position | Substrate (# position)          | Substrate code |
|----------|---------------------------------|----------------|
| 1        | D-Glucose (# 1)                 | GLU            |
| 2        | D-Fructose (# 2)                | FRU            |
| 3        | D-Galactose (# 3)               | GAL            |
| 4        | D-Trehalose (# 4)               | TRE            |
| 5        | D-Mannose (# 5)                 | MNE            |
| 6        | L-Sorbose (# 6)                 | SBE            |
| 7        | D-Melibiose (# 7)               | MEL            |
| 8        | Sucrose (# 8)                   | SAC            |
| 9        | D-Raffinose (# 9)               | RAF            |
| 10       | Maltotriose (# 10)              | MTE            |
| 11       | Maltose (# 11)                  | MAL            |
| 12       | Lactose (# 12)                  | LAC            |
| 13       | Lactulose (# 13)                | LTE            |
| 14       | 1-O-Methyl-B-galactoside (# 14) | MbGa           |
| 15       | 1-O-Methyl-a-galactoside (# 15) | MaGa           |
| 16       | D-Cellobiose (# 16)             | CEL            |
| 17       | Gentiobiose (# 17)              | GEN            |
| 18       | 1-O-Methyl-B-D-glucoside (# 18) | MbGu           |
| 19       | Esculin (black color) (# 19)    | ESC            |
| 20       | D-Ribose (# 20)                 | RIB            |
| 21       | L-Arabinose (# 21)              | ARA            |
| 22       | D-Xylose (# 22)                 | XYL            |
| 23       | Palatinose (# 23)               | PLE            |
| 24       | L-Rhamnose (# 24)               | RHA            |
| 25       | L-Fucose (# 25)                 | FUC            |
| 26       | D-Melezitose (# 26)             | MLZ            |
| 27       | D-Arabitol (# 27)               | DARL           |
| 28       | L-Arabitol (# 28)               | LARL           |
| 29       | Xylitol (# 29)                  | XLT            |
| 30       | Dulcitol (# 30)                 | DUL            |
| 31       | D-Tagatose (# 31)               | TAG            |
| 32       | Glycerol (# 32)                 | GLY            |
| 33       | myo-Inositol (# 33)             | INO            |
| 34       | D-Mannitol (# 34)               | MAN            |
| 35       | Maltitol (# 35)                 | MTL            |
| 36       | D-Turanose (# 36)               | TUR            |
| 37       | D-Sorbitol (# 37)               | SOR            |
| 38       | Adonitol (# 38)                 | ADO            |
| 39       | HQ-B-glucuronide (# 39)         | HBG            |
| 40       | D-Lyxose (# 40)                 | LYX            |
| 41       | i-Erythritol (# 41)             | ERY            |
| 42       | 1-O-Methyl-a-D-glucoside (# 42) | MDG            |
| 43       | 3-O-Methyl-D-glucose (# 43)     | 3MDG           |
| 44       | D-Saccharate (# 44)             | SAT            |
| 45       | Mucate (# 45)                   | MUC            |
| 46       | L-Tartrate (# 46)               | LTAT           |
| 47       | D-Tartrate (# 47)               | DTAT           |
| 48       | meso-Tartrate (# 48)            | MTAT           |
| 49       | D-Malate (# 49)                 | DMLT           |

|    |                                  |      |
|----|----------------------------------|------|
| 50 | L-Malate (# 50)                  | LMLT |
| 51 | cis-Aconitate (# 51)             | CATE |
| 52 | trans-Aconitate (# 52)           | TATE |
| 53 | Tricarallylate (# 53)            | TTE  |
| 54 | Citrate (# 54)                   | CIT  |
| 55 | D-Glucuronate (# 55)             | GRT  |
| 56 | D-Galacturonate (# 56)           | GAT  |
| 57 | 2-Ketogluconate (# 57)           | 2KG  |
| 58 | 5-Ketogluconate (# 58)           | 5KG  |
| 59 | Tryptophan (orange color) (# 59) | TRY  |
| 60 | N-Acetyl-D-glucosamine (# 60)    | NAG  |
| 61 | D-Gluconate (# 61)               | GNT  |
| 62 | Phenylacetate (# 62)             | PAC  |
| 63 | Protocatechuate (# 63)           | PAT  |
| 64 | 4-Hydroxybenzoate (# 64)         | pOBE |
| 65 | Quinate (# 65)                   | QAT  |
| 66 | Gentisate (# 66)                 | GTE  |
| 67 | 3-Hydroxybenzoate (# 67)         | mOBE |
| 68 | Benzoate (# 68)                  | BAT  |
| 69 | 3-Phenylpropionate (# 69)        | PPAT |
| 70 | m-Coumarate (# 70)               | CMT  |
| 71 | Trigonelline (# 71)              | TGE  |
| 72 | Betaine (# 72)                   | BET  |
| 73 | Putrescine (# 73)                | PCE  |
| 74 | 4-Aminobutyrate (# 74)           | ABT  |
| 75 | Histamine (# 75)                 | HIN  |
| 76 | DL-Lactate (# 76)                | LAT  |
| 77 | Caprate (# 77)                   | CAP  |
| 78 | Caprylate (# 78)                 | CYT  |
| 79 | L-Histidine (pink color) (# 79)  | HIS  |
| 80 | Succinate (# 80)                 | SUC  |
| 81 | Fumarate (# 81)                  | FUM  |
| 82 | Glutarate (# 82)                 | GRE  |
| 83 | DL-Glycerate (# 83)              | GYT  |
| 84 | 5-Aminovalerate (# 84)           | AVT  |
| 85 | Ethanolamine (# 85)              | ETN  |
| 86 | Tryptamine (# 86)                | TTN  |
| 87 | D-Glucosamine (# 87)             | GLN  |
| 88 | Itaconate (# 88)                 | ITA  |
| 89 | 3-Hydroxybutyrate (# 89)         | 3OBU |
| 90 | L-Aspartate (# 90)               | APT  |
| 91 | L-Glutamate (# 91)               | GTT  |
| 92 | L-Proline (# 92)                 | PRO  |
| 93 | D-Alanine (# 93)                 | DALA |
| 94 | L-Alanine (# 94)                 | LALA |
| 95 | L-Serine (# 95)                  | SER  |
| 96 | Malonate (# 96)                  | MNT  |
| 97 | Propionate (# 97)                | PROP |
| 98 | L-Tyrosine (# 98)                | TYR  |
| 99 | 2-Ketoglutarate (# 99)           | 2KT  |

---
