# Supplementary material for: Virulent Clones of Klebsiella pneumoniae: Identification and Evolutionary Scenario Based on Genomic and Phenotypic Characterization
Source: PLoS One. 2009 Mar 25;4(3):e4982. doi: 10.1371/journal.pone.0004982 (PMC2656620; doi:10.1371/journal.pone.0004982)
Supplement: Table S1 — Strains. Characteristics of the 235 strains included in the study. (0.13 MB XLS) [file pone.0004982.s001.xls]

## Sheet: Feuil1
Table S1. Characteristics of the 235 Klebsiella pneumoniae isolates or strains.
Key	Strain	OtherName1	TaxonomicDesignation	ST	Clonal Complex	K_type ded (b)	K_type	C_pattern	gnd_allele	Country	Source	IsolationYear	magA	allS	rmpA	mrkD	kfu	cf29a	fim	uge	wabG	ureA	% of surviving mice	Probable duplicate (a)
SB2397	cur24339		K. p. subsp. pneumoniae	14	CC14K2			Failed	0038	Curacao	Feces	2002	0	0	0	1	1	0	1	1	1	1	100
SB41	11A094		K. p. subsp. pneumoniae	14	CC14K2			Failed	0038	Italy	Blood	1997	0	0	0	1	1	0	1	1	1	1	100
SB2390	cur15505		K. p. subsp. pneumoniae	14	CC14K2	K2		C2e	0038	Curacao	Urin. tract	2002	0	0	0	1	1	0	1	1	1	1	100
SB2399	cur24911		K. p. subsp. pneumoniae	14	CC14K2	K2		C2e	0038	Curacao	Throat	2002	0	0	0	1	1	0	1	1	1	1
SB2407	cur35389		K. p. subsp. pneumoniae	14	CC14K2	K2		C2b	0038	Curacao	Urin. tract	2002	0	0	0	1	1	0	1	1	1	1
SB2410	cur35850		K. p. subsp. pneumoniae	14	CC14K2	K2		C2e	0038	Curacao	Throat	2002	0	0	0	1	1	0	1	1	1	1
SB3198	35		K. p. subsp. pneumoniae	14	CC14K2	K2	2	C2e	0038		Laboratory strain		0	0	0	1	1	0	1	1	1	1	100
SB3200	779		K. p. subsp. pneumoniae	14	CC14K2	K2	2	C2e	0038	France	Abcess	1981	0	0	0	1	1	0	1	1	1	1	100
SB3201	1584		K. p. subsp. pneumoniae	14	CC14K2	K2	2	C2b	0038	France	Blood	1988	0	0	0	1	1	0	1	1	1	1	100
SB3202	777		K. p. subsp. pneumoniae	14	CC14K2	K2	2	C2c	0038	France	Blood	1981	0	0	0	1	1	0	1	1	1	1
SB10	01A018		K. p. subsp. pneumoniae	15	CC14K2	K24	24	C24a	0023	Austria	Blood	1997	0	0	0	1	1	0	1	1	1	1
SB1111	15E050		K. p. subsp. pneumoniae	15	CC14K2	K24	24	C24a	0023	Portugal	Urin. tract	1997	0	0	0	1	1	0	1	1	1	1
SB113	06E046		K. p. subsp. pneumoniae	15	CC14K2	K24	24	C24b	0023	France	Urin. tract	1997	0	0	0	1	1	0	1	1	1	1
SB126	13D044		K. p. subsp. pneumoniae	15	CC14K2	K24		C24a	0023	Poland	Wound or Soft tissue	1997	0	0	0	1	1	0	1	1	1	1
SB20	04A025		K. p. subsp. pneumoniae	15	CC14K2	K24	24	C24a	0023	France	Blood	1997	0	0	0	1	1	0	1	1	1	1	100
SB209	06A395		K. p. subsp. pneumoniae	15	CC14K2	K24		C24b	0023	France	Blood	1998	0	0	0	1	1	0	1	1	1	1
SB3261	1589		K. p. subsp. pneumoniae	15	CC14K2	K24	24	C24a	0023	France	Blood	1988	0	0	0	1	1	0	1	1	1	1	100
SB3322	1485		K. p. subsp. pneumoniae	15	CC14K2	K24	24	Failed	0023	France	Hospital env.	1988	0	0	0	1	1	0	1	1	1	1
SB3203	34	D5050	K. p. subsp. pneumoniae	78	CC14K2	K2	2	C2d	0038		Laboratory strain		0	0	0	1	1	0	1	1	1	1
SB3199	778		K. p. subsp. pneumoniae	80	CC14K2	K2	2	C2e	0038	France	CSF	1981	0	0	0	1	1	0	1	1	1	1	100
SB14	02A029		K. p. subsp. pneumoniae	23	CC23K1	K1		C1a	0012	Belgium	Blood	1997	1	1	0	1	1	1	1	1	1	1
SB3308	1037		K. p. subsp. pneumoniae	23	CC23K1	K1	1.58	C1a		France	Horse	1985	1	1	1	1	1	1	1	1	1	1
SB3309	1056		K. p. subsp. pneumoniae	23	CC23K1	K1	1.58	C1a		France	Horse	1985	1	1	0	1	1	1	1	1	1	1	100
SB3310	1570		K. p. subsp. pneumoniae	23	CC23K1	K1	1.58	C1a		France	Mare, metritis	1988	1	1	1	1	1	1	1	1	1	1	25
SB3926	A3021		K. p. subsp. pneumoniae	23	CC23K1	K1		C1a		Taiwan	Liver abscess		1	1	1	1	1	0	1	1	1	1
SB3927	A5011		K. p. subsp. pneumoniae	23	CC23K1	K1		C1a		Taiwan	Liver abscess		1	1	1	1	1	1	1	1	1	1
SB3928	NTUH_K2044		K. p. subsp. pneumoniae	23	CC23K1	K1		C1a		Taiwan	Liver abscess		1	1	1	1	1	0	1	1	1	1	0
SB42	12A041		K. p. subsp. pneumoniae	23	CC23K1	K1		C1a	0012	Netherlands	Blood	1997	1	1	1	1	1	1	1	1	1	1	0
SB53	16A151		K. p. subsp. pneumoniae	23	CC23K1	K1		C1a		Spain	Blood	1997	1	1	1	1	1	1	1	1	1	1
SB235	08A418		K. p. subsp. pneumoniae	26	CC23K1	K61	61	C10b	0047	Germany	Blood	1998	0	0	0	1	0	0	1	1	1	1	100
SB3431	Zaire1		K. p. subsp. pneumoniae	57	CC23K1	K1		C1a	0012	France	Liver abscess		1	1	1	1	1	1	1	1	1	1	0
SB2803	V9902406	VI9C3	K. p. subsp. pneumoniae	163	CC23K1	K35	35	C35d		Netherlands	Horse, abdomen, peritinitis	1999	0	0	0	1	0	0	1	1	1	1	100
SB148	14A069		K. p. subsp. pneumoniae	25	CC65K2	K2		C2a	0017	Poland	Blood	1997	0	0	0	1	0	0	1	1	1	1	100
SB2740	V0100348	VIII7A9	K. p. subsp. pneumoniae	65	CC65K2	K2		C2a	0016	Netherlands	Cat nose, rhinitis		0	0	1	1	0	0	1	1	1	1	25
SB3196	1594		K. p. subsp. pneumoniae	65	CC65K2	K2	2	C2a	0016	France	Monkey	1988	0	0	1	1	0	0	1	1	1	1	0
SB3332	03-9138		K. p. subsp. pneumoniae	65	CC65K2	K2		C2a	0016	Carribean	Anal abscess	2003	0	0	1	0	0	0	0	1	1	1	100
SB166	B5055	K2 ref. strain	K. p. subsp. pneumoniae	66	CC65K2	K2	2	C2a	0016		Ref		0	0	1	1	0	1	1	1	1	1
SB3194	CIP 52.145	B 5055 = NCTC 5055	K. p. subsp. pneumoniae	66	CC65K2	K2	2	C2a	0016		K2 ref. strain		0	0	1	1	0	1	1	1	1	1		4
SB3195	675	Vaccine	K. p. subsp. pneumoniae	66	CC65K2	K2	2	C2a	0016	France	Vaccine strain	1980	0	0	1	1	0	1	1	1	1	1	25
SB3341	KP52145	K2 ref patho	K. p. subsp. pneumoniae	66	CC65K2	K2		C2a	0016		REF		0	0	1	1	0	1	1	1	1	1	0	4
SB3929	N3423		K. p. subsp. pneumoniae	243	CC65K2					Taiwan	Non-invasive Taiwan strain		0	0	0	1	0	0	1	1	1	1
SB167	C5046	K3 ref. strain	K. p. subsp. rhinoscleromatis	67	CC67rh	K3	3	C3a	0046		Ref		0	0	1	1	0	0	1	1	1	1
SB1782	CIP52-210T	ATCC 13884 T	K. p. subsp. rhinoscleromatis	67	CC67rh	K3		C3a	0046		GRANULOMA		0	0	1	1	0	0	1	1	1	1		3
SB1783	745	745	K. p. subsp. rhinoscleromatis	67	CC67rh	K3		C3a	0046	France	Rhinoscleroma		0	0	1	1	0	0	1	1	1	1
SB1785	475		K. p. subsp. rhinoscleromatis	67	CC67rh	K3	3	C3a		Poland	Sputum	1977	0	0	1	1	0	0	1	1	1	1
SB1793	SB1793		K. p. subsp. rhinoscleromatis	67	CC67rh	K3	3	C3a	0046	Austria	Granuloma	2001	0	0	1	1	0	0	1	1	1	1
SB3177	03-2455		K. p. subsp. rhinoscleromatis	67	CC67rh	K3	3	C3a		Mali	Rhinoscleroma	2003	0	0	1	1	0	0	1	1	1	1
SB3205	CIP 52.210 T		K. p. subsp. rhinoscleromatis	67	CC67rh	K3	3	C3a	0046		Type strain													3
SB3207	ATCC 6908		K. p. subsp. rhinoscleromatis	67	CC67rh	K3	3	C3a	0046		Reference strain		0	0	1	1	0	0	1	1	1	1
SB3208	CIP 54.45		K. p. subsp. rhinoscleromatis	67	CC67rh	K3	3	C3a	0045	Vietnam	Nose	1954	0	0	1	1	0	0	1	1	1	1
SB3209	CIP 54.129		K. p. subsp. rhinoscleromatis	67	CC67rh	K3	3	C3a	0045	Vietnam	Rhinoscleroma	1954	0	0	1	1	0	0	1	1	1	1
SB3210	475		K. p. subsp. rhinoscleromatis	67	CC67rh	K3	3	C3a	0046	Poland	Sputum	1977
SB3213	746		K. p. subsp. rhinoscleromatis	67	CC67rh	K3	3	C3a	0046	Algeria	Rhinoscleroma	1981	0	0	1	1	0	0	1	1	1	1
SB3218	34.81	34.81	K. p. subsp. rhinoscleromatis	67	CC67rh	K3	3	C3a	0042	France	Nose	1981	0	0	1	1	0	0	1	1	1	1
SB3219	42.79	42.79	K. p. subsp. rhinoscleromatis	67	CC67rh	K3	3	C3a	0046	France	Nose	1979	0	0	1	1	0	0	1	1	1	1
SB3432	04-6021	CIMB	K. p. subsp. rhinoscleromatis	67	CC67rh	K3			0046	France	Rhinoscleroma	2004	0	0	1	1	0	0	1	1	1	1
SB3214	839		K. p. subsp. rhinoscleromatis	68	CC67rh	K3	3	C3a	0046	France	Nose	1982
SB3182	408		K. p. subsp. pneumoniae	81	CC82K1	K1	1	C1a	0012	France	Blood	1976	1	0	1	0	1	0	1	1	1	1
SB3183	428		K. p. subsp. pneumoniae	81	CC82K1	K1	1	C1a	0012	France	Blood	1976	1	0	0	0	1	0	1	1	1	1	100
SB3192	920		K. p. subsp. pneumoniae	81	CC82K1	K1	1	C1a	0012	France	Pleural fluid	1984	1	0	1	0	1	0	1	1	1	1
SB165	A5054	K1 ref. strain	K. p. subsp. pneumoniae	82	CC82K1	K1	1	C1a	0012		Ref		1	0	1	0	1	0	1	1	1	1		5
SB3178	CIP 52.208	A 5054	K. p. subsp. pneumoniae	82	CC82K1	K1	1	C1a	0012		K1 ref. strain		1	0	1	0	1	0	1	1	1	1
SB3179	CIP A215		K. p. subsp. pneumoniae	82	CC82K1	K1	1	C1a	0011	France	Eyelid	1954	1	0	1	0	1	0	1	1	1	1
SB3180	CIP 52.144	ATCC 13886 = NCTC 5054	K. p. subsp. pneumoniae	82	CC82K1	K1	1	C1a	0012		Laboratory strain		1	0	1	0	1	0	1	1	1	1	100	5
SB3181	398		K. p. subsp. pneumoniae	82	CC82K1	K1	1	C1a	0012	Belgium	Sputum	1976	1	0	1	0	1	0	1	1	1	1
SB3186	468		K. p. subsp. pneumoniae	82	CC82K1	K1	1	C1a	0012	France	Trachea	1977	1	0	0	0	1	0	1	1	1	1
SB3188	643		K. p. subsp. pneumoniae	82	CC82K1	K1	1	C1a	0012	France	CSF	1980	1	0	1	0	1	0	1	1	1	1	43
SB3189	687		K. p. subsp. pneumoniae	82	CC82K1	K1	1	C1a	0012	France	CSF	1980	1	0	1	0	1	0	1	1	1	1
SB3191	798		K. p. subsp. pneumoniae	82	CC82K1	K1	1	C1a	0012	France	Sputum	1982	1	0	1	0	1	0	0	1	1	1
SB3193	926		K. p. subsp. pneumoniae	82	CC82K1	K1	1	C1a	0011	France	Blood	1984	1	0	1	0	1	0	1	1	1	1	100
SB3184	440		K. p. subsp. pneumoniae	83	CC82K1	K1	1	C1a	0012	France	Blood	1977	1	0	1	0	1	0	1	1	1	1
SB3187	503		K. p. subsp. pneumoniae	84	CC82K1	K1	1	C1a	0012	France	Sputum	1977	1	0	1	0	1	0	1	1	1	1
SB3514	10213526		K. p. subsp. ozaenae	90	CC91oz
SB3515	41204088		K. p. subsp. ozaenae	90	CC91oz
SB1787	No909	29-11-1995	K. p. subsp. ozaenae	90	CC91oz	K4		C4c	0012	France	Ozaena		0	0	1	0	1	0	1	1	1	1
SB3223	1575		K. p. subsp. ozaenae	90	CC91oz	K4	4	C4a	0012	France	Blood	1988	0	0	0	0	0	0	1	1	1	1
SB3225	909		K. p. subsp. ozaenae	90	CC91oz	K4	4	C4c	0012	France	Bronchial asp	1984
SB3464	De Champs1		K. p. subsp. ozaenae	90	CC91oz	K4		C4g	0012	France			0	0	1	0	1	0	1	1	1	1
SB176	ATCC 11296T	CIP 52211T	K. p. subsp. ozaenae	91	CC91oz	K4	4	C4a	0012		REF		0	0	0	1	0	0	1	1	1	1		1
SB1788	No892	25-05-1992	K. p. subsp. ozaenae	91	CC91oz	K4		C4a	0012	France	Ozaena		0	0	0	0	0	0	1	1	1	1
SB3220	CIP 52.211 T	D 5050	K. p. subsp. ozaenae	91	CC91oz	K4	4	C4a	0012	Indonesia	K4 ref. strain	1931	0	0	1	0	0	0	1	1	1	1
SB3221	ATCC 11296 T		K. p. subsp. ozaenae	91	CC91oz	K4	4	C4a	0012	Indonesia	Type strain	1931	0	0	1	0	0	0	1	1	1	1		1
SB3222	863		K. p. subsp. ozaenae	91	CC91oz	K4	4	C4a		France	Sputum	1983
SB172	ATCC11297		K. p. subsp. ozaenae	91	CC91oz	K5	nt	C5a	0005		REF		0	0	0	0	1	0	1	1	1	1		2
SB3231	CIP 52.212	E 5051=ATCC11297=NCTC 5051	K. p. subsp. ozaenae	91	CC91oz	K5	5	C5a	0005	Netherlands	K5 ref. strain	1937	0	0	0	0	1	0	1	1	1	1		2
SB3224	919		K. p. subsp. ozaenae	92	CC91oz	K4	4	C4b	0012	France	Lung	1989	0	0	1	0	1	1	1	1	1	1
SB3226	1611		K. p. subsp. ozaenae	93	CC91oz	K4	4	C4d	0012	France	Blood	1989
SB1786	No753		K. p. subsp. ozaenae	95	CC91oz			Failed		France	Ozaena	1992	0	0	0	0	1	0	1	1	1	1
SB1172			K. p. subsp. ozaenae	96	CC91oz	K4		C4a	0012		Granuloma	2001	0	0	0	0	0	0	1	1	1	1
SB130	18C048		K. p. subsp. pneumoniae	1		K45		C45a	0001	Spain	Resp. tract	1997
SB152	18C100		K. p. subsp. pneumoniae	1		K45		C45a	0001	Spain	Resp. tract	1998
SB210	06E037		K. p. subsp. pneumoniae	2		K52	52	C52a	0001	France	Urin. tract	1997
SB132	ATCC 13883T	CIP 82.91 T; NCTC 9633	K. p. subsp. pneumoniae	3		K3	3	C3a	0044		REF		0	0	1	1	0	1	1	1	1	1
SB3204	CIP 52.146		K. p. subsp. pneumoniae	3		K3	3	C3a			K3 ref. strain		0	0	1	1	0	1	1	1	1	1
SB3206	CIP 82.91 T	ATCC 13883 T	K. p. subsp. pneumoniae	3		K3	3	C3a	0044		Type strain		0	0	1	1	0	1	1	1	1	1
SB1103	18E092		K. p. subsp. pneumoniae	4		K10		C10a	0050	Spain	Urin. tract	1998
SB129	14E044		K. p. subsp. pneumoniae	4		K157		C157	0050	Poland	Urin. tract	1997
SB108	01A114		K. p. subsp. pneumoniae	5		K39	39	C39b	0007	Austria	Blood	1997
SB139	10A160		K. p. subsp. pneumoniae	5		K39		C39b	0007	Italy	Blood	1997
SB93	14A010		K. p. subsp. pneumoniae	5		K39	39	C39b	0007	Poland	Blood	1997
SB3240	1583		K. p. subsp. pneumoniae	6		K7	7	C7a		France	Horse	1988
SB62	19A035		K. p. subsp. pneumoniae	6		K7		C7a		Switzerland	Blood	1997
SB25	05A103		K. p. subsp. pneumoniae	7		K54	54	C119	0014	France	Blood	1997
SB1109	05D002		K. p. subsp. pneumoniae	8		K3	3	C3c	0043	France	Wound or Soft tissue	1997	0	0	0	1	0	0	1	1	1	1
SB124	11E006		K. p. subsp. pneumoniae	9		K8		C8b	0015	Italy	Urin. tract	1997
SB28	06A093		K. p. subsp. pneumoniae	10		K35	35	C35c	0003	France	Blood	1997
SB2	03B031		K. p. subsp. pneumoniae	11		K13	13	C13a	0009	France	Resp. tract	1997
SB3931	N5322		K. p. subsp. pneumoniae	12						Taiwan			0	0	0	1	0	0	1	0	1	1
SB5	15A006		K. p. subsp. pneumoniae	12		K35	35	C35c	0003	Portugal	Blood	1997
SB2396	cur24329		K. p. subsp. pneumoniae	13		K3	3	C3a	0042	Curacao	Feces	2002	0	0	0	1	1	0	1	1	1	1
SB3215	1509		K. p. subsp. pneumoniae	13		K3	3	C3a	0042	France	Feces	1988	0	0	0	1	1	0	1	1	1	1
SB3216	1635		K. p. subsp. pneumoniae	13		K3	3	C3a	0042	France	Pus	1989	0	0	0	1	1	1	1	1	1	1
SB3217	1649		K. p. subsp. pneumoniae	13		K3	3	C3a	0042	France	Blood	1989	0	0	0	1	1	1	1	1	1	1
SB1091	04C047		K. p. subsp. pneumoniae	16		K35	35	C122	0053	France	Resp. tract	1997	0	0	0	1	0	0	1	1	1	1
SB1066	SB4-1		K. p. subsp. pneumoniae	17				C104	0039	Netherlands	Feces
SB3446	23045	23045	K. p. subsp. pneumoniae	17						Senegal	Diarrhoeae
SB3449	22069	22069	K. p. subsp. pneumoniae	17						Senegal	Diarrhoeae
SB1067	SB4-2		K. p. subsp. pneumoniae	17		K104		C104	0039	Netherlands	Feces
SB29	07A023		K. p. subsp. pneumoniae	17		K131		C131	0004	Germany	Blood	1997
SB64	20A181		K. p. subsp. pneumoniae	17		K25	25	C25b	0018	United Kingdom	Blood	1997
SB164	09A323		K. p. subsp. pneumoniae	18		K35	35	C101	0051	Greece	Blood	1997
SB3	08A028		K. p. subsp. pneumoniae	19		K28		C28a	0029	Germany	Blood	1997
SB32	08A082		K. p. subsp. pneumoniae	20		K109		C109	0005	Germany	Blood	1997
SB207	09A425		K. p. subsp. pneumoniae	21					0009	Greece	Blood	1998
SB21	04A041		K. p. subsp. pneumoniae	22		K9		C9a	0028	France	Blood	1997
SB12	01A067		K. p. subsp. pneumoniae	24		K25	25	C25b	0025	Austria	Blood	1997
SB1159	SB1159		K. p. subsp. pneumoniae	27		K22		C22,37a	0027	Netherlands	Feces
SB44	12A178		K. p. subsp. pneumoniae	27		K62	62	C62a	0025	Netherlands	Blood	1997
SB1112	04C035		K. p. subsp. pneumoniae	28		K112		C112	0002	France	Resp. tract	1997
SB115	09A199		K. p. subsp. pneumoniae	29					0019	Greece	Blood	1997
SB142	09A317		K. p. subsp. pneumoniae	29					0019	Greece	Blood	1997
SB143	09A256		K. p. subsp. pneumoniae	29					0019	Greece	Blood	1997
SB114	09A098		K. p. subsp. pneumoniae	29		K30		C30b	0019	Greece	Blood	1997
SB112	05A096		K. p. subsp. pneumoniae	29		K54	54	C119	0016	France	Blood	1997
SB88	17A092		K. p. subsp. pneumoniae	29		K54	54	C119	0016	Spain	Blood	1997
SB2770	V9613813	IV3.49	K. p. subsp. pneumoniae	30		K64	64	C64a	0030	Netherlands	Cat urine, cystitis
SB592	09A434		K. p. subsp. pneumoniae	31		K30	30	C30b	0019	Greece	Blood	1998
SB1102	08C003		K. p. subsp. pneumoniae	32		K54		C119	0013	Germany	Resp. tract	1997
SB16	03A085		K. p. subsp. pneumoniae	33		K13		C13a	0009	France	Blood	1997
SB17	03A097		K. p. subsp. pneumoniae	34		K31	31	C132	0010	France	Blood	1997
SB52	16A111		K. p. subsp. pneumoniae	35		K22	37	C22,37a	0027	Spain	Blood	1997
SB54	16A175		K. p. subsp. pneumoniae	35		K22	22,37	C22,37a	0027	Spain	Blood	1997
SB118	09D053		K. p. subsp. pneumoniae	36		K27		C27a	0015	Greece	Wound or Soft tissue	1997
SB138	09D080		K. p. subsp. pneumoniae	36		K27	27	C27a	0015	Greece	Wound or Soft tissue	1997
SB3238	1543		K. p. subsp. pneumoniae	36		K7	7	C7a		France	Horse, penis	1988
SB3239	1563		K. p. subsp. pneumoniae	36		K7	7	C7a		France	Horse, penis	1989
SB3241	1604		K. p. subsp. pneumoniae	36		K7	7	C7a		France	Horse, sperm	1988
SB3323	1544		K. p. subsp. pneumoniae	36		K7	7			France	Horse, penis	1988
SB208	07A471		K. p. subsp. pneumoniae	37					0040	Germany	Blood	1998
SB3447	K0306117		K. p. subsp. pneumoniae	37						Senegal	Diarrhoeae
SB3458	GDB	GDB	K. p. subsp. pneumoniae	37						Senegal	Diarrhoeae
SB4	11A023		K. p. subsp. pneumoniae	37		K14		C14a	0040	Italy	Blood	1997
SB1139	SB1139		K. p. subsp. pneumoniae	37		K8		C8b	0015	Netherlands	Feces
SB1140	SB1140		K. p. subsp. pneumoniae	37		K8		C8b	0015	Netherlands	Feces
SB107	MGH 78578	ATCC700721	K. p. subsp. pneumoniae	38		K52	52	C52a	0001	Unspecified	REF	1994	0	0	0	1	0	0	1	1	1	1
SB151	18A365		K. p. subsp. pneumoniae	39		K128	19,53	C128	0031	Spain	Blood	1998
SB65	20A188		K. p. subsp. pneumoniae	40		K106		C106	0033	United Kingdom	Blood	1997
SB19	04A022		K. p. subsp. pneumoniae	41		K21,44	21.44	C110	0035	France	Blood	1997
SB154	22E041		K. p. subsp. pneumoniae	42					0003	Turkey	Urin. tract	1997
SB204	20A292		K. p. subsp. pneumoniae	42		K22,37	22,37	C102	0026	United Kingdom	Blood	1997
SB153	22A027		K. p. subsp. pneumoniae	43		K30	30	C30a	0020	Turkey	Blood	1997
SB162	24A013		K. p. subsp. pneumoniae	43		K30	35	C30a	0020	Turkey	Blood	1997
SB3269	CIP 52.235		K. p. subsp. pneumoniae	43		K30	30	C30a			K30 ref. strain
SB128	14E015		K. p. subsp. pneumoniae	44		K24	K24	C121	0037	Poland	Urin. tract	1997
SB149	14A076		K. p. subsp. pneumoniae	44		K24	K24	C121	0037	Poland	Blood	1997
SB1170	SB1170		K. p. subsp. pneumoniae	45		K24		C24a	0049	Netherlands	Feces		0	0	0	1	0	0	1	1	1	1
SB1171	SB1171		K. p. subsp. pneumoniae	45		K24		C24a	0049	Netherlands	Feces		0	0	0	1	0	0	1	1	1	1
SB22	05A012		K. p. subsp. pneumoniae	45		K24	24	C24a	0049	France	Blood	1997
SB614	3-1	3-1	K. p. subsp. pneumoniae	46		K64	64	C64a	0030	Netherlands	Rijnhauwen bridge river water
SB197	2002/49	K25 ref. strain	K. p. subsp. pneumoniae	47		K25	25	C25a	0015		Ref
SB3262	CIP 52.230	2002/49	K. p. subsp. pneumoniae	47		K25	25	C25a	0015		K25 ref. strain
SB2726	V0008640	VIII2D5	K. p. subsp. pneumoniae	48		K62		C62a	0025	Netherlands	Bovine, pus, abscess
SB2719	V0005540	VII10F4	K. p. subsp. pneumoniae	49		K7	7	C7a	0048	Netherlands	Foal, faeces, diarrhoea	2000
SB612	2-3	2-3	K. p. subsp. pneumoniae	50		K116		C116	0032	Netherlands	Rijnhauwen bridge river water
SB604	865	Kpn 865	K. p. subsp. pneumoniae	51		K30		C30a	0021	France
SB616	5-1	5-1	K. p. subsp. pneumoniae	52		K11	11	C109	0034	Netherlands	Natuurgebied canal (trouble water)
SB35	09A062		K. p. subsp. pneumoniae	53		K39		C39b	0007		Blood	1997
SB517	R76	KLOZ01	K. p. subsp. pneumoniae	54		K14		C14a	0040		Ref
SB617	5-2	5-2	K. p. subsp. pneumoniae	55		K33		C33d	0034	Netherlands	Natuurgebied canal (trouble water)
SB1142	SB1142		K. p. subsp. pneumoniae	56		K115		C115	0047	Netherlands	Feces
SB1148	SB1148		K. p. subsp. pneumoniae	56		K115		C115	0047	Netherlands	Feces
SB1145	SB1145		K. p. subsp. pneumoniae	58				C104	0039	Netherlands	Feces
SB196	1680/49	K24 ref strain	K. p. subsp. pneumoniae	59		K24	24	C24a	0022		Ref													6
SB3260	CIP 52.229	1680/49	K. p. subsp. pneumoniae	59		K24	24	C24a	0022		K24 ref. strain													6
SB2720	V0005560	VII10F6	K. p. subsp. pneumoniae	60		K5	5	C5a	0005	Netherlands	Foal, synovia, arthritis	2000	0	0	1	1	1	0	1	1	1	1
SB2721	V0005882	VII10I2	K. p. subsp. pneumoniae	60		K5	5	C5a		Netherlands	Foal, synovia, arthritis	2000	0	0	1	1	1	0	1	1	1	1
SB3232	189		K. p. subsp. pneumoniae	61		K5	5	C5a	0005		Laboratory strain	1973	0	0	1	1	1	0	1	1	1	1
SB618	5-3	5-3	K. p. subsp. pneumoniae	62		K33		C33b	0034	Netherlands	Natuurgebied canal (trouble water)
SB619	5-4	5-4	K. p. subsp. pneumoniae	62		K33		C33b	0034	Netherlands	Natuurgebied canal (trouble water)
SB628	5-6	5-6	K. p. subsp. pneumoniae	62		K33		C33b	0034	Netherlands	Natuurgebied canal (trouble water)
SB615	3-2	3-2	K. p. subsp. pneumoniae	62		K33		C33b	0034	Netherlands	Rijnhauwen bridge
SB611	2-2	2-2	K. p. subsp. pneumoniae	63		K27,28	27,28	C109	0005	Netherlands	Rijnhauwen bridge
SB1156	SB1156		K. p. subsp. pneumoniae	70		K35		C35c	0003	Netherlands	Feces
SB2761	V9301316	II7H3	K. p. subsp. pneumoniae	71		K3	3	C3b	0042	Netherlands	Bird		0	0	0	1	0	0	1	1	1	1
SB3263	1581		K. p. subsp. pneumoniae	72		K25	25	C25b	0024	France	Blood	1988
SB3264	1601		K. p. subsp. pneumoniae	73		K25	25	C25b	0024	France	Feces	1988
SB2717	V0005401	VII10G8	K. p. subsp. pneumoniae	74		K130		C130	0008	Netherlands	Dog urine, cystitis
SB2718	V0005402	VII10G7	K. p. subsp. pneumoniae	74		K130		C130	0008	Netherlands	Dog vagina, endometritis
SB1153	SB1153		K. p. subsp. pneumoniae	75		K135		C135		Netherlands	Feces
SB2737	V0013491	VIII6A1	K. p. subsp. pneumoniae	76					0041	Netherlands	Bird trachea, tracheitis
SB597	D55/1	D55/1	K. p. subsp. pneumoniae	77		K55		C55a	0006		Environment
SB1154	SB1154		K. p. subsp. pneumoniae	85				C125	0052	Netherlands	Feces
SB3197	CIP 52.204	ATCC 7380	K. p. subsp. pneumoniae	86		K2	2	C2e	0038		Laboratory strain
SB2722	V0006137	VII11B6	K. p. subsp. pneumoniae	87		K49		C49a	0036	Netherlands	Bovine milk, mastitis
SB1144	SB1144		K. p. subsp. pneumoniae	88					0007	Netherlands	Feces
SB605	281	Kpn 281	K. p. subsp. pneumoniae	89					0007	France	Environment
SB169	KLSP05	K5 ref. strain	K. p. subsp. pneumoniae	97		K5	5	C16a	0005		Ref		0	0	0	1	1	0	1	1	1	1
SB3272	1553		K. p. subsp. pneumoniae	127		K30	30	C30b		France	Horse, sperm	1989
SB2767	V9606407	III9.07	K. p. subsp. pneumoniae	128		K6	6	C6a		Netherlands	Foal, liver, sepsis	1996
SB3444	11125	11125	K. p. subsp. pneumoniae	129						Senegal	Diarrhoeae
SB3451	F1541	F1541	K. p. subsp. pneumoniae	129						Senegal	Diarrhoeae
SB2820	V9403876	III5.56	K. p. subsp. pneumoniae	131		K30	30	C30a		Netherlands	Horse, uterus, endometritis	1994
SB3270	1569		K. p. subsp. pneumoniae	131		K30	30	C30a		France	Horse, penis	1988
SB3271	1623		K. p. subsp. pneumoniae	131		K30	30	C30a		France	Horse, sperm	1988
SB3315	1567		K. p. subsp. pneumoniae	131		K30	30	C30a		France	Horse, penis	1988
SB3589	THEV1		K. p. subsp. pneumoniae	136						France
SB2729	V0009500	VIII2I6	K. p. subsp. pneumoniae	148		K11	11	C11a		Netherlands	Horse Nose, rhinitis	2000
SB2731	V0010123	VIII3F6	K. p. subsp. pneumoniae	149		K5	nt	C5a		Netherlands	Foal, lung, pneumonia	2000	0	0	1	1	1	0	1	1	1	1
SB2755	V0111740	IX4G6	K. p. subsp. pneumoniae	150		K25	25	C25c		Netherlands	Horse, uterus	2001
SB2776	V9708477	IV.11.63	K. p. subsp. pneumoniae	151		K30	30	C30a		Netherlands	Horse, uterus, endometritis	1997
SB2813	V9908836	VII3F5	K. p. subsp. pneumoniae	152		K53	53	C53b		Netherlands	Horse, skin, dermitis	1999
SB2819	V9402520	II9B6	K. p. subsp. pneumoniae	153		K3	3	C3d		Netherlands	Foal, urine, cystitis	1994	0	0	0	1	0	0	1	1	1	1
SB3237	CIP 52.205	Aerogenes 4140	K. p. subsp. pneumoniae	154		K7	7	C7a			K7 ref. strain
SB3258	CIP 52.226	1996/49	K. p. subsp. pneumoniae	155		K22	22	C22,37a			K22 ref. strain
SB3293	700	CIP 80.46	K. p. subsp. pneumoniae	156		K47	47	C47a		France	Wood, tropical	1980
SB3303	1629		K. p. subsp. pneumoniae	160		K62	62	C62a		France	Donkey	1988
SB2744	V0105176	VIII10G5	K. p. subsp. pneumoniae	161		K22	22,37	C22,37a		Netherlands	Horse, pus, preputium	2001
SB2745	V0105807	VIII11C1	K. p. subsp. pneumoniae	161		K22	22,37	C22,37a		Netherlands	Horse, uterus, endometritis	2001
SB2817	V0007598	VIII1E4	K. p. subsp. pneumoniae	161		K22	22,37	C22,37a		Netherlands	Horse, uterus, endometritis	2000
SB2756	V0111815	IX4F1	K. p. subsp. pneumoniae	164		K55	55	C108		Netherlands	Horse, abdomen, colic	2001
SB3343	1057		K. p. subsp. pneumoniae	165		K30	30	C30a		France	Horse	1985
SB2764	V9310327	III5.43	K. p. subsp. pneumoniae	168		K39	39	C39b		Netherlands	Horse, uterus, endometritis	1993
SB3281	CIP 53.12		K. p. subsp. pneumoniae	171		K22	37	C22,37a			K37 ref. strain
SB3326	1547		K. p. subsp. pneumoniae	172		K6	6	C6-X		France	Mare, uterus	1988
SB3930	N3529		K. p. subsp. pneumoniae	244		K106		C106		Taiwan	Non-invasive Taiwan strain		0	0	0	1	0	0	1	1	1	1
nt: non typable.
(a) Each pair of identical numbers corresponds to a probable subculture of the same original strain.
(b) K type deduced by comparison of the C-pattern of the strain with those in the reference C-pattern database.
