# Supplementary material for: Virulent Clones of Klebsiella pneumoniae: Identification and Evolutionary Scenario Based on Genomic and Phenotypic Characterization
Source: PLoS One. 2009 Mar 25;4(3):e4982. doi: 10.1371/journal.pone.0004982 (PMC2656620; doi:10.1371/journal.pone.0004982)
Supplement: Table S2 — Primers used for virulence genes PCR. (0.04 MB XLS) [file pone.0004982.s002.xls]

## Sheet: Feuil1
Table S2. PCR primers for Klebsiella pneumoniae virulence genes assays
Genes	Primer name	Primer sequence	Primer position	PCR product size	Accession No. of ref. sequence	Reference of primers	Annealing temperature
magA	magA-F	5'- GGT GCT CTT TAC ATC ATT GC -3'	10 - 29	1280	AB085741	Fang et al., 2004	50°C
	magA-R	5'- GCA ATG GCC ATT TGC GTT AG-3'	1272 - 1292
allS	1416R	5'- CCG TTA GGC AAT CCA GAC -3'	42 - 59	1090	AB115590	Chou et al., 2004	49°C
	336F2	5'- TCT GAT TTA (A/T)CC CAC ATT -3'	1131 - 1114
rmpA	rmpA-F	5'- ACT GGG CTA CCT CTG CTT CA -3'	43 - 62	535	NC_005249	This study	46°C
	rmpA-R	5'- CTT GCA TGA GCC ATC TTT CA -3'	558 - 578
mrkD	mrkD-1	5'- TAT (T/C)G(G/T) CTT AAT GGC GCT GG -3'	21 - 41	920	M24536	This study	50°C
	mrkD-2	5'- TAA TCG TAC GTC AGG TTA AAG A(C/T)C -3'	965 - 942
kfuBC	kfuB-F1179	5'- GAA GTG ACG CTG TTT CTG GC -3'	1159 - 1179 (on gene kfuB)	797	AB115591	Ma et al., 2005	55°C
	kfuC-R649	5'- TTT CGT GTG GCC AGT GAC TC -3'	630 - 649 (on gene kfuC)
cf29a	cf29a-F	5'- GAC TCT GAT TGC ACT GGC TGT G -3'	9 - 30	826	U26208	This study	51°C
	cf29a-R	5'- GTT ATA AGT TAC TGC CAC GTT C -3'	813 - 834
fimH	fim-1	5'- GCT CTG GCC GAT AC(C/T) AC(C/G) ACG G -3'	60 - 81	423	M20917	This study	55°C
	fim-2	5'- GC(G/A) (A/T)A (G/A)T AAC G(T/C) GCC TGG AAC GG -3'	461 - 483
uge	uge-F	5'- GAT CAT CCG GTC TCC CTG TA -3'	491 - 510	534	AY294624	Regue et al., 2004	53°C
	uge-R	5'- TCT TCA CGC CTT CCT TCA CT -3'	1005 - 1025
wabG	wabG-F	5'- CGGACTGGCAGATCCATATC -3'	149 - 168	683	AY823268	This study	53°C
	wabG-R	5'- ACCATCGGCCATTTGATAGA -3'	812 - 831
ureA	ureA-F	5'- GCT GAC TTA AGA GAA CGT TAT G -3'	-19 - +3 (RC of VII, Maroncle et al., 2005)	337	M36068	This study	55°C
	ureA-R	5'- GAT CAT GGC GCT ACC T(C/T) A -3'	301 - 318 (RC of VIII, Maroncle et al., 2005)
RC: reverse complement
